# Supplementary material
Source: Springer Nature journal article supplement (https://www.springermedizin.de/resource/supplementary/12931_2012_1327_MOESM5_ESM.pdf/9426038)

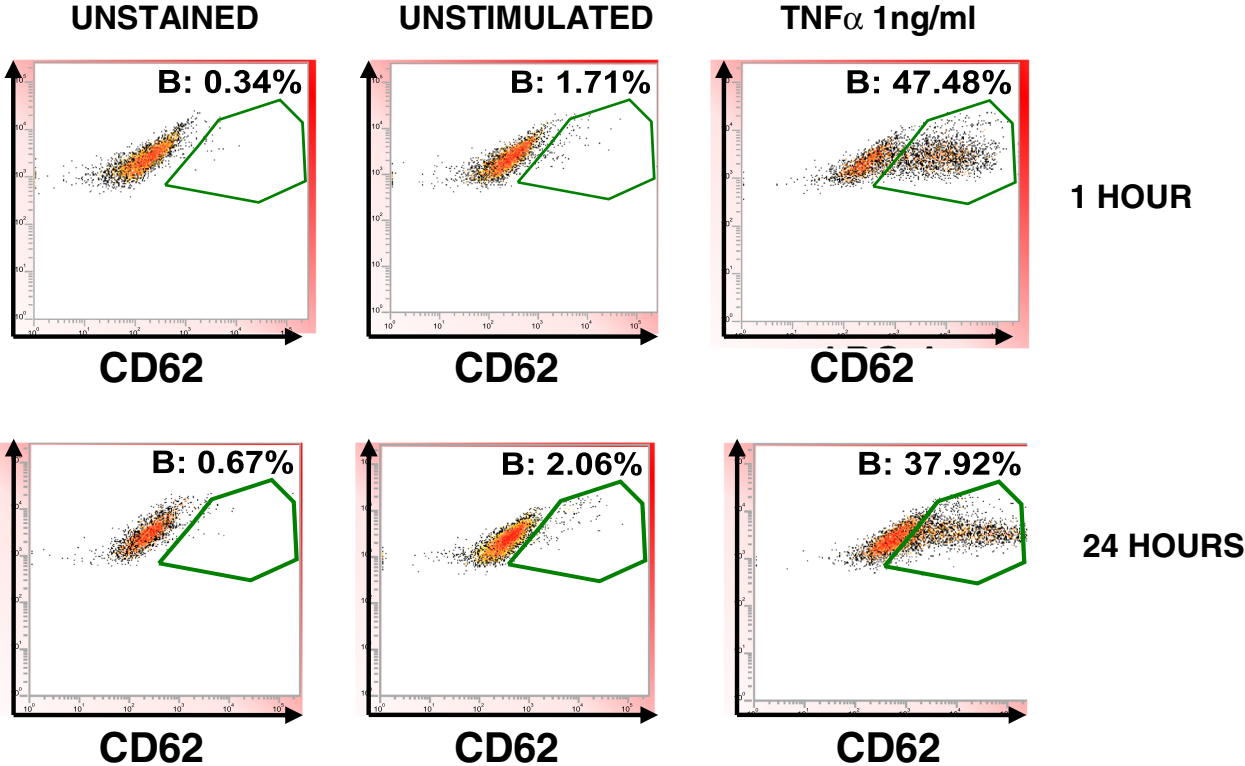

**Response of LMVECs to TNF $\alpha$  stimulation (1ng/ml)**

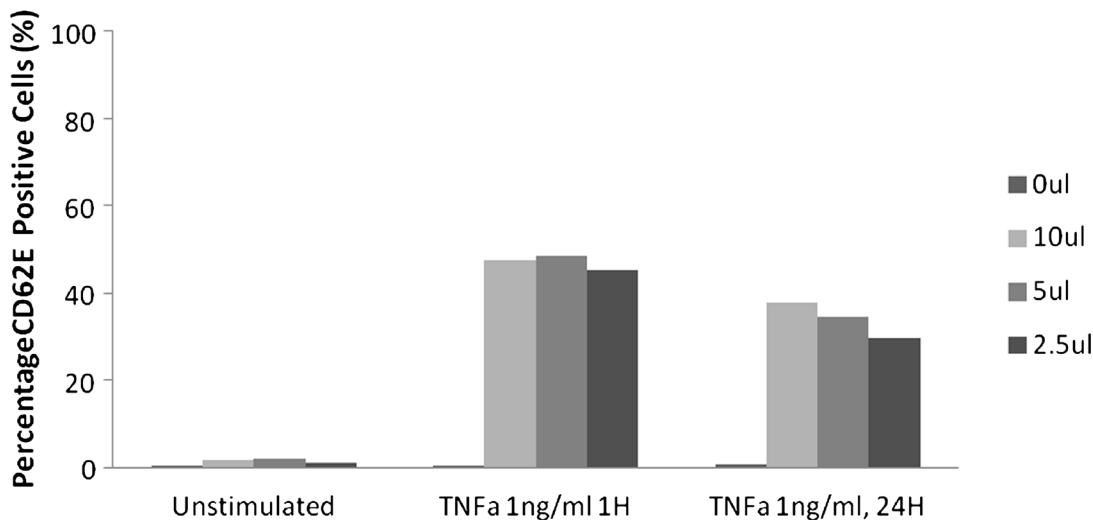

Supplement: MOESM5 [file 9426038]
